# Supplementary material for: Measurement report: Intra-annual variability of black carbon and brown carbon and their interrelation with meteorological conditions over Gangtok, Sikkim
Source: Copernicus journal article supplement (doi:10.5194/acp-24-11585-2024), 2024-10-16
Supplement: Supplementary file 1 [file acp-24-11585-2024-supplement.pdf]

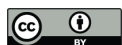

*Supplement of*

## **Measurement report: Intra-annual variability of black carbon and brown carbon and their interrelation with meteorological conditions over Gangtok, Sikkim**

**Pramod Kumar et al.**

*Correspondence to:* Rakesh Kumar Ranjan (rkranjan@cus.ac.in)

The copyright of individual parts of the supplement might differ from the article licence.

## 13 S1 Methodology

### 14 S1.1 Black carbon and Brown carbon Analysis

15 The Aethalometer AE33 is an optical instrument that provides real-time measurements of  
16 aerosol light absorption and reports black carbon (BC) concentrations (Dutt et al., 2018; Gupta  
17 et al., 2017). Specifically, the AE33 can measure BC concentrations in atmospheric particulate  
18 matter (PM) with a diameter of 2.5 micrometres (PM<sub>2.5</sub>) (Dutt et al., 2018).

19 To collect aerosol particles, the Aethalometer model AE33 draws a stream of aerosol-filled air  
20 through a spot on a filter tape. It then analyzes the transmission of light through the sample-  
21 containing filter tape and compares it to the transmission of light through an unloaded part of  
22 the filter tape, which serves as a reference zone for detecting the aerosol (Sharma et al., 2022).  
23 The instrument measures the amount of light that passes through the sample-filled filter, and  
24 calculates the attenuation coefficient (*ATN*) by analyzing how quickly the attenuation changes  
25 over time. The attenuation of light, which is proportional to the BC mass concentration, can  
26 be calculated using Equation S1.

$$27 \quad ATN = -100 \times \ln \frac{I}{I_0} \quad \text{Eq. (S1)}$$

28 The attenuation coefficient (*ATN*) is defined as the ratio of the intensity of light transmitted  
29 through a loaded filter (*I*) to the intensity of light transmitted through an unloaded reference  
30 portion (*I<sub>0</sub>*).

$$31 \quad b_{ATN} = \frac{A}{Q} \times \left( \frac{1}{100} \right) \times \left( \frac{\Delta ATN}{\Delta t} \right) \quad \text{Eq. (S2)}$$

32 Where, A is the spot size, Q is the flow into the instrument, Δ*t* is the change in time (Karakoti  
33 et al., 2022).

34 The scattering of light can impact the optical absorption of aerosols on the filter, and this is  
35 quantified by the factor C, which is dependent on the filter material (Weingartner et al., 2003).  
36 It's worth noting that the aerosol absorption coefficient (*b<sub>abs</sub>*) can be significantly different from  
37 the actual concentration of airborne particles. To account for this, calibration factors C (with a  
38 multiple scattering parameter of 1.57) and R (*ATN*) are added to translate aethalometer  
39 attenuation readings to actual absorption coefficients (Gupta et al., 2022; Gupta et al., 2017;  
40 Aruna et al., 2014; Weingartner et al., 2003).

$$41 \quad b_{abs} = b_{ATN} / C \cdot R (ATN) \quad \text{Eq. (S3)}$$

42 Two variables, C and R, can modify the optical properties of the filter. Due to the multiple  
43 scatterings of light, the value of C is typically greater than one. Therefore, the aethalometer  
44 output data can be expressed using equation (S4), which involves converting the attenuation  
45 coefficient to the absorption coefficient, and then calculating the mass-equivalent black carbon

46 concentration by dividing the absorption coefficient by the BC-specific mass absorption cross-  
 47 section (Petzold et al., 1997).  $ATN$  and BC relationship is given in figure (S2) for the daily  
 48 data.

$$49 \quad BC(\lambda) = \frac{b_{abs} \lambda}{\sigma_{abs} \lambda} \quad \text{Eq. (S4)}$$

50 The absorption coefficient ( $b_{abs}(\lambda)$ ) is measured in meters to the power of negative one ( $m^{-1}$ ),  
 51 and the mass absorption cross-section in air ( $\sigma_{abs}(\lambda)$ ) is expressed in meters squared per gram  
 52 ( $m^2 g^{-1}$ ). For the AE-33 model, the value of  $\sigma$  at a wavelength of 880 nm is constant and set at  
 53  $7.77 m^2 g^{-1}$  (Petzold et al. 1997, Weingartner et al. 2003, Martinsson et al., 2017).

54

55 Sandradewi et al. (2008) presents a comprehensive overview of the aethalometer, while  
 56 Drinovec et al. (2015) discusses its applications (Sharma et al., 2022). The Aethalometer AE33  
 57 measures the absorption of light by aerosol particles at seven wavelengths that range from  
 58 near-infrared to near-ultraviolet (370, 470, 525, 590, 660, 880, and 950 nm). The 880 nm signal  
 59 is used to calculate the total BC mass absorption (Dutt et al., 2018; Gupta et al., 2017). Real-  
 60 time BC concentrations are calculated using the rate of change of light absorption with a 2-  
 61 minute temporal resolution (Dutt et al., 2018; Drinovec et al., 2015). Channel 6 data (measured  
 62 at 880 nm) is utilized as a reference standard to report black carbon concentrations, as the  
 63 absorption at this wavelength is mainly attributed to BC alone, with other aerosols absorbing  
 64 relatively little at 880 nm (Drinovec et al., 2015; Sandradewi et al., 2008a). Additionally, using  
 65 the Sandradewi et al. (2008) model, the equipment also contributes traces of biomass  
 66 burning/fossil fuel combustion to black carbon concentration in ambient air due to variations  
 67 in the spectrum dependencies of the absorption coefficients, as given in equation S5.

$$68 \quad b_{abs}(\lambda) = b_{absff}(\lambda) + b_{absbb}(\lambda) \quad \text{Eq. (S5)}$$

69 Based on Sandradewi et al. (2008a), it is assumed that the overall absorption of aerosol light  
 70 comes from biomass burning ( $bb$ ) or fossil fuel ( $ff$ ) combustion as reported by Martinsson et al.  
 71 (2017).

## 72 **S1.2 Source apportionment**

73 BC measurements at 470 nm and 950 nm wavelengths can serve as indicators of local fossil  
 74 fuel combustion and biomass burning, and therefore help identify their possible sources (Gupta  
 75 et al., 2022; Kumar et al., 2018; Gupta et al., 2017; Kirchstetter et al. 2004). By measuring the  
 76 absorption frequency across the 370-950 nm range, it is possible to estimate the contribution  
 77 of these sources to the total aerosol absorption. The values of  $\sigma_{abs}$  can then be used to derive

78 the absorption wavelength exponents ( $\alpha_{abs}$ ) at seven different wavelengths (Moosmüller et al.,  
79 2011b; Ganguly et al., 2005; Krichester et al., 2004).

$$80 \quad \beta_{abs}(\lambda) = K \cdot \lambda^{-\alpha} \quad \text{Eq. (S6)}$$

81 where  $\beta_{abs}$  denote mass absorption efficiency,  $K$  denotes a constant,  $\lambda$  is the light wavelength,  
82 and  $\alpha$  is the absorption Angstrom exponent (AAE) (Laskin et al., 2015).

83 The percentage fractionation of BC was calculated using the Sandradewi et al., 2008 model.  
84 The aerosol optical absorption coefficient has specific values of the absorption angstrom  
85 exponent, which sums the contributions to aerosol absorption from burning biomass and  
86 burning fossil fuels (AAE). The two sources (biomass burning and fossil fuel) have spectral  
87 dependence of  $\lambda^{-1}$  and  $\lambda^{-2}$ , respectively (Favez et al., 2010; Sandradewi et al., 2008, Kirchstetter  
88 et al., 2004). For source apportionment, the wavelengths 470 and 950 nm were chosen  
89 (Sandradewi et al., 2008), where  $\lambda_1$  is 470 and  $\lambda_2$  is 950. The absorption dependence of various  
90 particles was used to compute the contributions of  $\beta_{abs_{bb}}$  (biomass) and  $\beta_{abs_{ff}}$  (fossil fuel) at  
91 two distinct wavelengths ( $\lambda_1, \lambda_2$ ) (Gupta et al., 2022).

92 The Sandradewi et al. (2008) model was used to calculate the fractionation percentage of BC.  
93 The model includes specific values of the absorption angstrom exponent (AAE), which  
94 accounts for the contributions to aerosol absorption from burning biomass and burning fossil  
95 fuels. Biomass burning and fossil fuel sources have spectral dependencies of  $\lambda^{-1}$  and  $\lambda^{-2}$ ,  
96 respectively (Kirchstetter et al., 2004; Favez et al., 2010; Sandradewi et al., 2008). The  
97 wavelengths of 470 nm and 950 nm were chosen for source apportionment, where  $\lambda_1$  is 470  
98 and  $\lambda_2$  is 950 (Sandradewi et al., 2008). The contributions of  $\beta_{abs_{bb}}$  (biomass) and  $\beta_{abs_{ff}}$  (fossil  
99 fuel) at these two wavelengths ( $\lambda_1$  and  $\lambda_2$ ) were calculated using the absorption dependence  
100 of various particles (Gupta et al., 2022).

$$101 \quad \frac{\beta_{abs}(\lambda_1)_{ff}}{\beta_{abs}(\lambda_2)_{ff}} = \left(\frac{\lambda_1}{\lambda_2}\right)^{-\alpha_{ff}} \quad \text{Eq. (S7)}$$

$$102 \quad \frac{\beta_{abs}(\lambda_1)_{bb}}{\beta_{abs}(\lambda_2)_{bb}} = \left(\frac{\lambda_1}{\lambda_2}\right)^{-\alpha_{bb}} \quad \text{Eq. (S8)}$$

103 The fractionation of  $\beta_{bb}$  (biomass burning) at 950 nm and  $\beta_{ff}$  (fossil fuel combustion) at 470  
104 nm was estimated using the following equation.

$$105 \quad \beta_{abs}(\lambda) = \beta_{abs}(\lambda)_{ff} + \beta_{abs}(\lambda)_{bb} \quad \text{Eq. (S9)}$$

106 Where,  $\beta_{bb}$  represents the spectrally dependent mass absorption efficiency and  $\beta_{ff}$  represents  
107 the spectrally dependent mass absorption efficiency at 880 nm.

$$108 \quad BB(\%) = \frac{\beta_{abs}(\lambda_2)_{bb}}{\beta_{abs}(\lambda_2)} \quad \text{Eq. (S10)}$$

$$109 \quad BC_{bb} = BB \times BC \quad \text{Eq. (S11)}$$

$$110 \quad BC_{ff} = (1 - BB) \times BC \quad \text{Eq. (S12)}$$

111

112 The average concentration of light-absorbing carbon particles was determined by taking  
 113 readings from the aethalometer at different wavelengths. Various studies have reported  $BC_{ff}$   
 114 values around 1 and  $BC_{bb}$  values approximately 2 (Kant et al., 2020; Zotter et al., 2017; Herich  
 115 et al., 2011; Sandradewi et al., 2008b).

$$116 \quad BrC = \frac{b_{absBrC(370)}}{MAC_{BrC(370)}} \quad \text{Eq. (S13)}$$

117 The equation S13 calculates the Brown Carbon (BrC) mass concentration using the mass  
 118 absorption coefficient ( $MAC_{BrC}$ ) at a specific wavelength (370 nm) (Laskin et al., 2015). The  
 119  $MAC_{BrC}$  represents the ability of Brown Carbon to absorb light at that wavelength.  $MAC_{BrC(370)}$   
 120 is the mass absorption coefficient for Brown Carbon at 370 nm (Qin et al., 2018). The default  
 121 value for  $MAC_{BrC}$  used is 4.5 m<sup>2</sup>/g.

### 122 **S1.3 LULC calculation**

123 The LULC calculation using Landsat data methodology is performed using QGIS. Here is a  
 124 summary of the methodology used for the LULC. (1) Imported Landsat data, (2) Pre-  
 125 processing of Landsat data to remove any noise or distortions using Semi-Automatic  
 126 Classification Plugin (SCP). This typically involves atmospheric correction, radiometric  
 127 calibration, and geometric correction. (3) Image classification tools used to assign each pixel  
 128 in the Landsat image to a specific land cover or land use class. This is done using various  
 129 classification algorithms, such as maximum likelihood, support vector machine (SVM), and  
 130 random forest. (4) Ground truthing has used collected field data to validate the accuracy, and  
 131 google map used for cross check. (5) Post-processing was utilized to refine the image  
 132 classification results to remove any errors or inconsistencies using the Geographic Resources  
 133 Analysis Support System (GRASS). This is completed using method, spatial smoothing, and  
 134 object-based analysis. (6) LULC mapping for creating a map of the land cover and land use  
 135 classes in the present study area based on the image classification results using the Semi-  
 136 Automatic Classification Plugin (SCP).

137

138

139

140

141

142

143

144

145

146

147

148

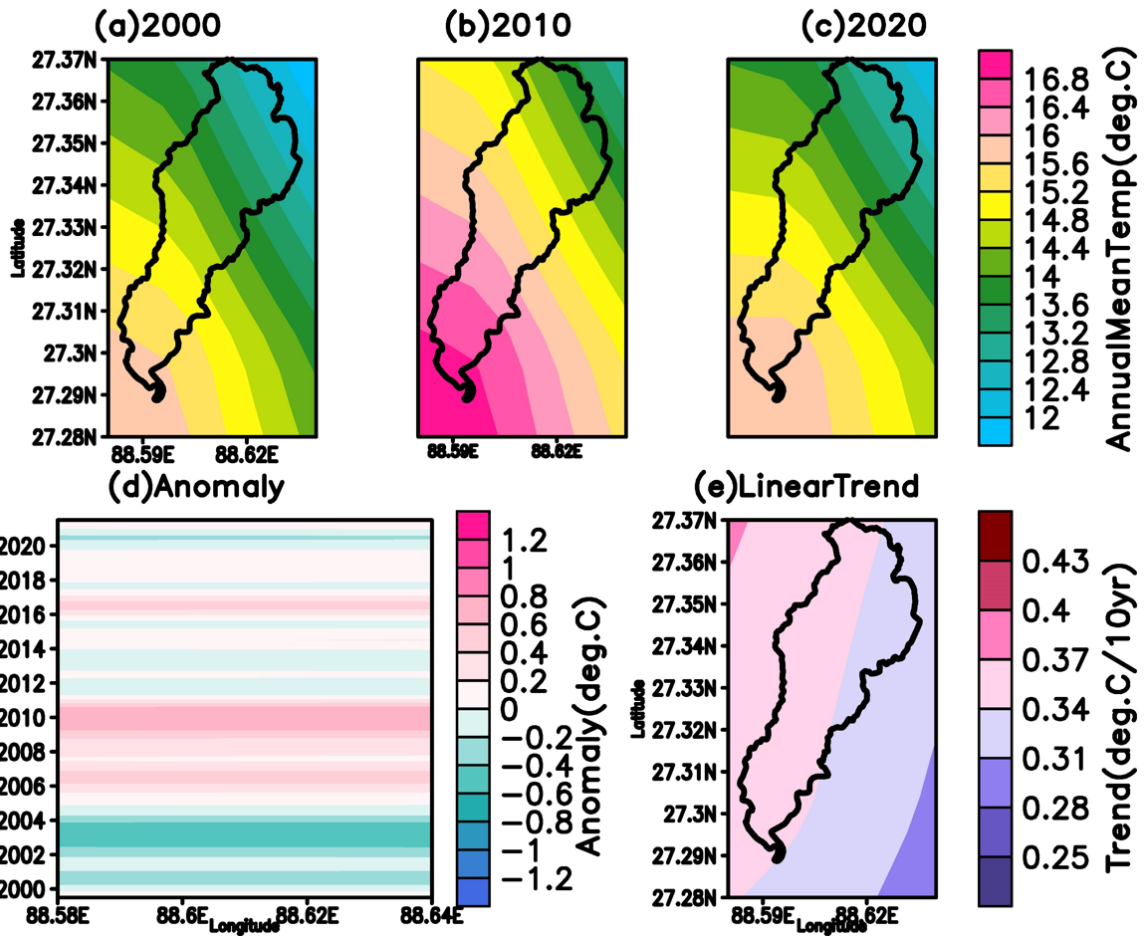

149

150 Figure S1. Spatiotemporal variation of temperature (2meter) for 2000 to 2020. Figures (a, b,  
 151 and c) are annual average temperature for the year 2000, 2010, and 2020 respectively. Figure  
 152 (d) is anomaly over Gangtok region, and (e) the decadal trend of temperature for 2000 to 2021  
 153 over entire Gangtok region.

154

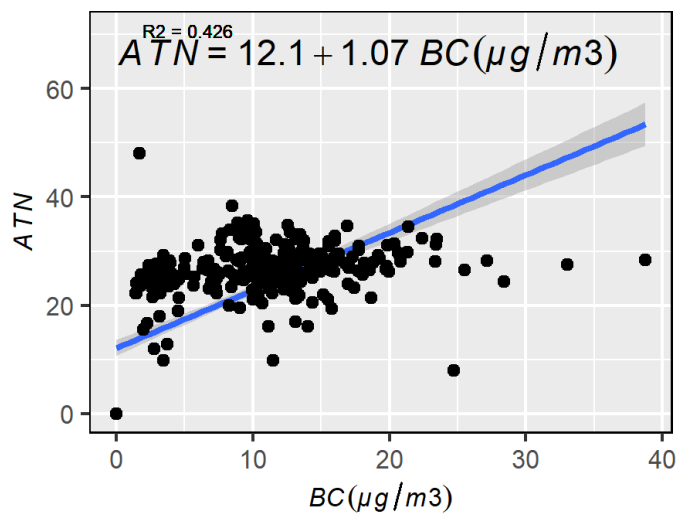

163 Figure S2. The relationship between and attenuation (ATN) vs black carbon (BC) for daily.

164

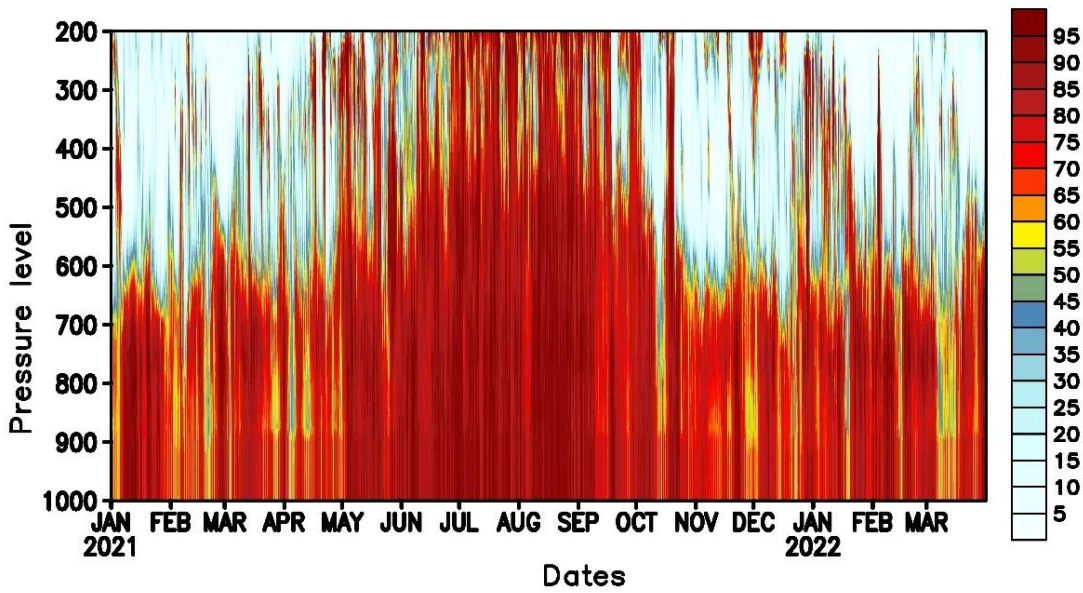

175 Figure S3. The daily relative humidity on pressure level for 1<sup>st</sup> January 2021 to 31<sup>st</sup> March  
 176 2022 over study location (lat:27.32; lon:88.61).

177

178

179

180

181

182

183

184

185

186

187

188

189

190

191

192

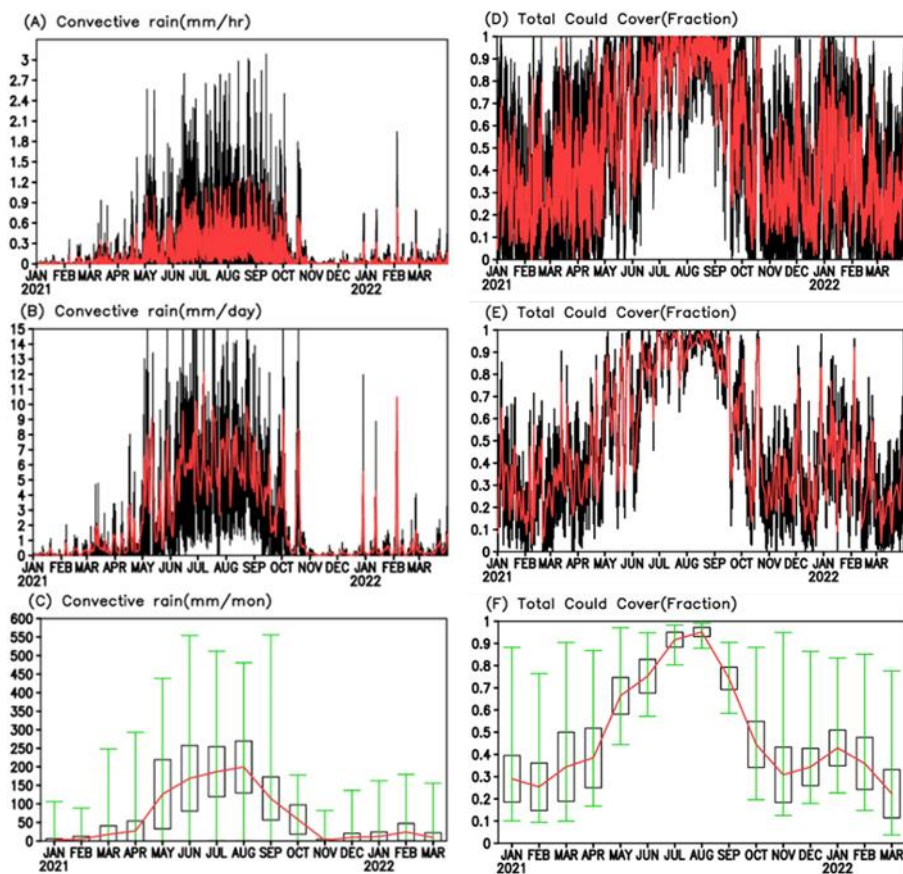

193 Figure S4. The convective rain for (A) hourly, (B) daily, (C) monthly and total cloud cover  
 194 (D) hourly, (E) daily, (F) monthly for 1st January 2021 to 31st March 2022 over study location  
 195 (lat:27.32; lon:88.61).

196

197

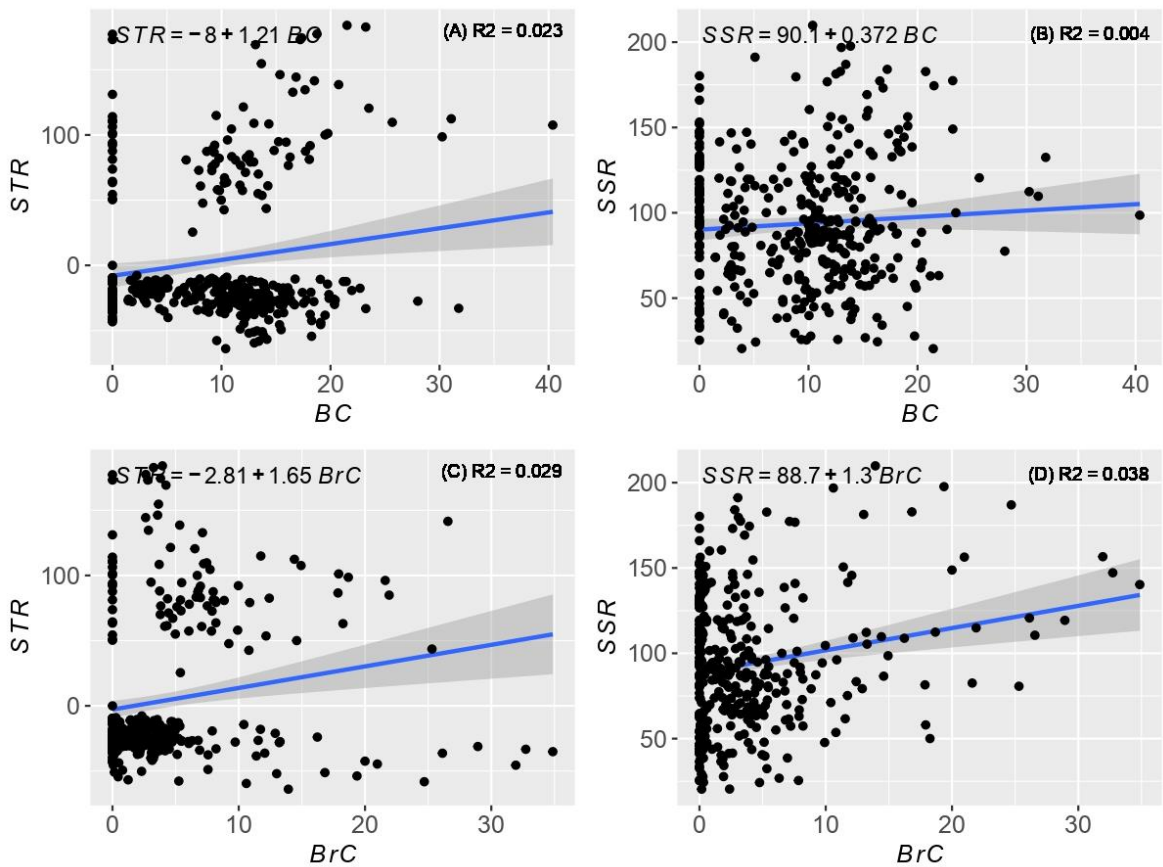

198

199 Figure S5. Inter-relationship in net solar and thermal radiation downward (SSR and STR) to  
 200 Black Carbon and Brown Carbon (BC and BrC); (A) for BC and STR, (B) for BC and SSR,  
 201 (C) for BrC and STR, and (D) BrC and SSR.

202

203

204

205

206

207

208

209

210

211

212



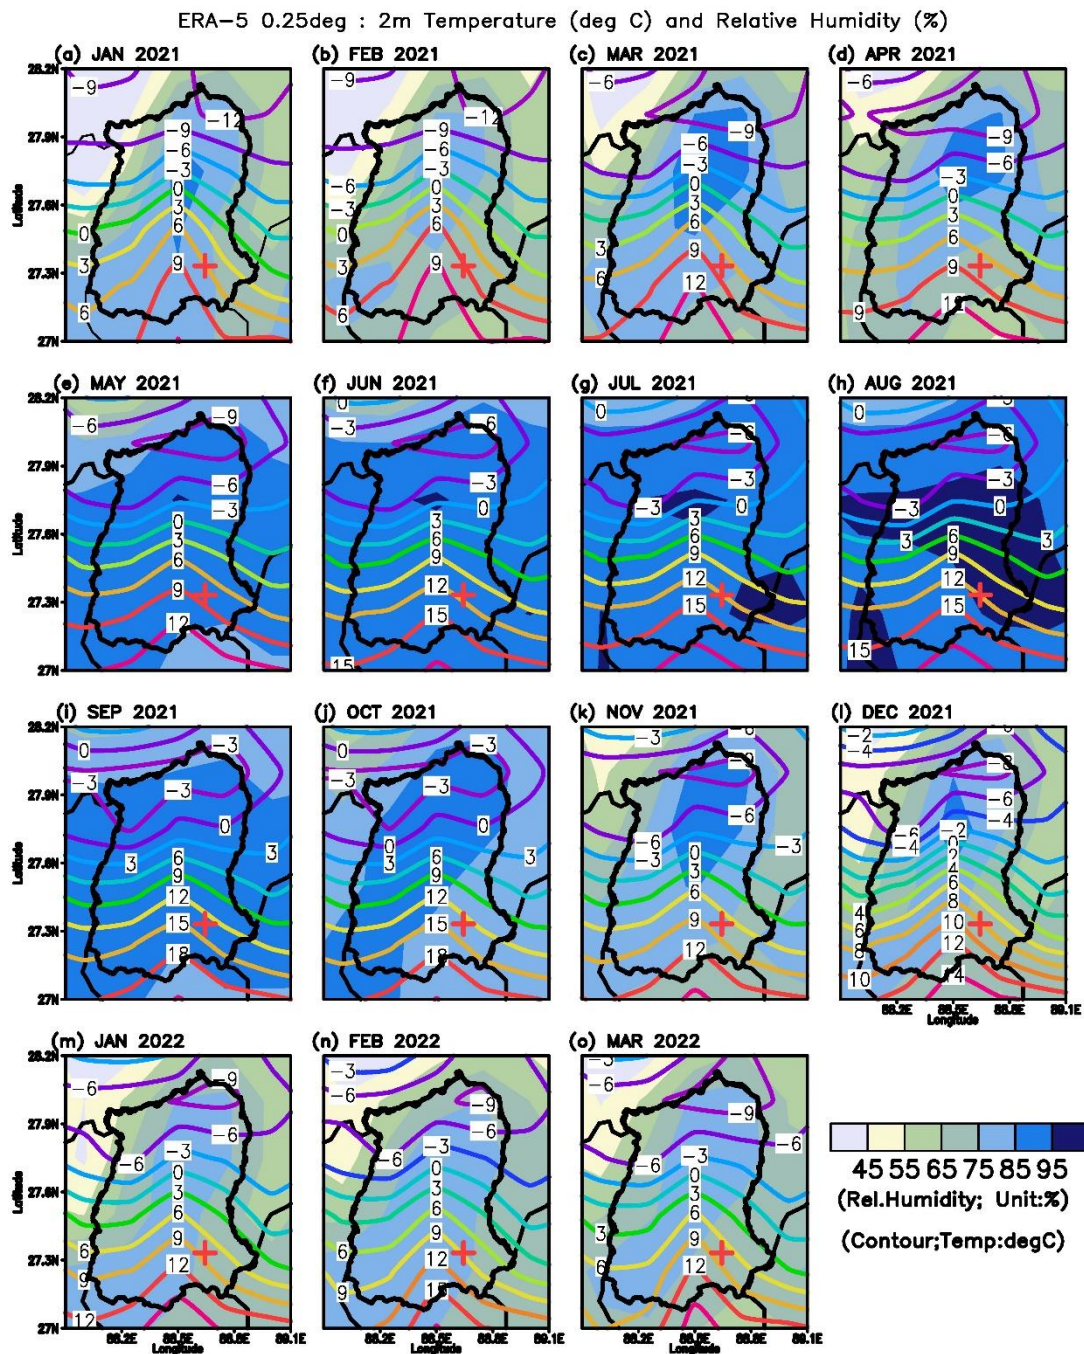

213 Figure S6. Monthly relative humidity and 2m mean temperature pattern during January 2021  
 214 to March 2022. The shading shows precipitation pattern, and streamline shows wind  
 215 circulation. The (+) mark is representation of sampling location.

216

217

218



219  
220  
221

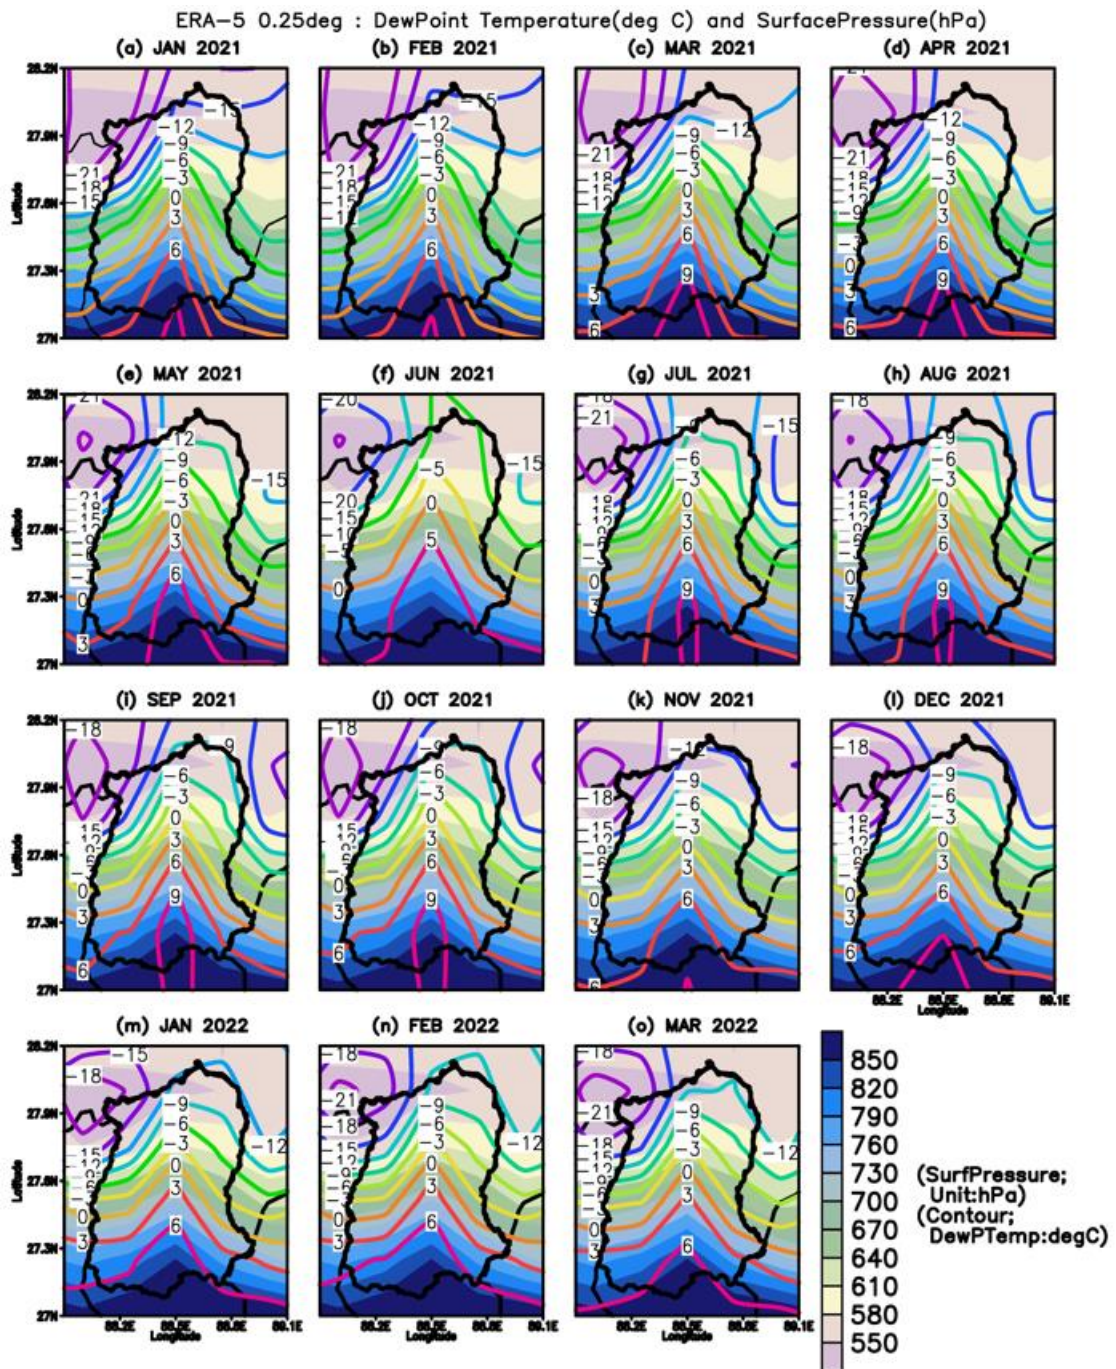

222 Figure S7. Monthly surface pressure and dewpoint temperature pattern during January 2021 to  
223 March 2022. The shading shows precipitation pattern, and streamline shows wind circulation.  
224

225 Table S1. The population change for three decades over the Sikkim.

| Year              | 2001     | 2011     | 2019     | References (footnote)                                                                                                                                                                                                                                                                                                        |
|-------------------|----------|----------|----------|------------------------------------------------------------------------------------------------------------------------------------------------------------------------------------------------------------------------------------------------------------------------------------------------------------------------------|
| Population        | 5,40,851 | 6,10,577 | 6,90,251 | Indian Census<br>( <a href="https://censusindia.gov.in/census.website/data/census-tables">https://censusindia.gov.in/census.website/data/census-tables</a> );<br>( <a href="https://statisticstimes.com/demographics/india/sikkim-population.php">https://statisticstimes.com/demographics/india/sikkim-population.php</a> ) |
| Growth (absolute) | 69,726   |          | 79,674   | Indian Census<br>( <a href="https://censusindia.gov.in/census.website/data/census-tables">https://censusindia.gov.in/census.website/data/census-tables</a> );<br>( <a href="https://statisticstimes.com/demographics/india/sikkim-population.php">https://statisticstimes.com/demographics/india/sikkim-population.php</a> ) |
| Rate (%)          | 12.9     |          | 13.05    | <a href="https://statisticstimes.com/demographics/india/sikkim-population.php">https://statisticstimes.com/demographics/india/sikkim-population.php</a>                                                                                                                                                                      |

226

227 Table S2. The diurnal data sets of the BC, BCbb, BCff, BrC, BB% CO<sub>2</sub>.

| Time | BC    | BCbb | BCff  | BrC  | BB%   | CO <sub>2</sub> |
|------|-------|------|-------|------|-------|-----------------|
| 1    | 8.81  | 0.34 | 7.99  | 1.18 | 5.53  | 344.02          |
| 2    | 6.14  | 0.33 | 5.56  | 1.47 | 7.16  | 342.19          |
| 3    | 5.16  | 0.36 | 4.54  | 1.47 | 9.45  | 341.24          |
| 4    | 4.78  | 0.38 | 4.01  | 1.49 | 10.41 | 340.76          |
| 5    | 5.79  | 0.32 | 5.20  | 0.89 | 6.64  | 341.28          |
| 6    | 7.38  | 0.33 | 6.90  | 0.71 | 5.49  | 343.07          |
| 7    | 10.75 | 0.36 | 10.25 | 0.24 | 4.04  | 346.40          |
| 8    | 16.91 | 0.38 | 16.34 | 0.00 | 2.76  | 349.87          |
| 9    | 20.18 | 0.46 | 19.57 | 0.00 | 2.83  | 352.68          |
| 10   | 15.99 | 0.69 | 15.05 | 2.95 | 4.78  | 354.45          |
| 11   | 12.09 | 0.80 | 11.07 | 4.08 | 8.40  | 351.10          |
| 12   | 8.52  | 0.69 | 7.62  | 3.77 | 10.26 | 343.69          |
| 13   | 5.44  | 0.56 | 4.72  | 2.82 | 12.88 | 336.78          |
| 14   | 4.44  | 0.46 | 3.80  | 2.24 | 13.31 | 334.01          |
| 15   | 3.91  | 0.45 | 3.34  | 2.12 | 14.12 | 331.98          |
| 16   | 3.82  | 0.44 | 3.33  | 2.18 | 14.80 | 330.86          |
| 17   | 4.30  | 0.46 | 3.60  | 2.30 | 14.44 | 332.14          |
| 18   | 6.19  | 0.53 | 5.46  | 2.57 | 12.44 | 334.34          |
| 19   | 10.47 | 0.73 | 9.57  | 3.17 | 9.85  | 342.46          |
| 20   | 14.67 | 0.82 | 13.52 | 3.93 | 8.44  | 346.65          |
| 21   | 17.23 | 0.83 | 15.81 | 3.29 | 7.72  | 349.23          |
| 22   | 19.76 | 0.66 | 17.85 | 1.79 | 5.17  | 349.87          |
| 23   | 18.27 | 0.48 | 17.16 | 1.49 | 4.84  | 349.04          |
| 24   | 12.98 | 0.37 | 11.74 | 1.64 | 5.08  | 346.01          |

228

229

230

231

232 Table S3. The monthly data set and basic statistics.

| Months | Variables | Minimum | Mean   | Maximum | Standard Error | Standard Deviation | Median |
|--------|-----------|---------|--------|---------|----------------|--------------------|--------|
| Mar-21 | BC        | 10.03   | 12.59  | 18.14   | 0.50           | 1.99               | 12.62  |
|        | BCbb      | 0.90    | 2.39   | 4.90    | 0.28           | 1.11               | 2.24   |
|        | BCff      | 7.81    | 10.19  | 16.63   | 0.50           | 2.00               | 9.96   |
|        | BrC       | 2.21    | 14.10  | 31.94   | 2.07           | 8.27               | 12.95  |
|        | BB%       | 7.49    | 19.89  | 33.20   | 2.00           | 8.02               | 18.91  |
|        | CO2       | 347.35  | 356.20 | 379.35  | 2.42           | 10.53              | 353.04 |
| Apr    | BC        | 4.33    | 12.98  | 31.76   | 2.14           | 7.42               | 12.36  |
|        | BCbb      | 1.16    | 2.51   | 3.63    | 0.22           | 0.77               | 2.86   |
|        | BCff      | 1.47    | 10.47  | 28.91   | 2.09           | 7.25               | 10.04  |
|        | BrC       | 5.46    | 17.46  | 34.87   | 2.87           | 9.93               | 16.29  |
|        | BB%       | 10.69   | 22.86  | 44.44   | 2.70           | 9.34               | 21.53  |
|        | CO2       | 346.95  | 355.43 | 370.37  | 1.21           | 6.54               | 351.75 |
| May    | BC        | 3.47    | 6.28   | 14.59   | 0.48           | 2.53               | 5.53   |
|        | BCbb      | 0.34    | 0.62   | 0.88    | 0.03           | 0.17               | 0.59   |
|        | BCff      | 2.66    | 5.66   | 13.86   | 0.49           | 2.57               | 4.94   |
|        | BrC       | 1.43    | 3.03   | 5.34    | 0.23           | 1.20               | 2.97   |
|        | BB%       | 5.43    | 13.02  | 24.28   | 0.99           | 5.26               | 12.07  |
|        | CO2       | 344.21  | 350.98 | 356.02  | 0.83           | 3.98               | 352.34 |
| Jun    | BC        | 1.45    | 2.86   | 3.88    | 0.12           | 0.66               | 2.94   |
|        | BCbb      | 0.19    | 0.47   | 0.90    | 0.03           | 0.17               | 0.45   |
|        | BCff      | 1.16    | 2.40   | 3.39    | 0.10           | 0.56               | 2.40   |
|        | BrC       | 0.94    | 2.91   | 11.72   | 0.36           | 1.95               | 2.38   |
|        | BB%       | 10.10   | 16.52  | 24.86   | 0.72           | 3.85               | 17.04  |
|        | CO2       | 336.43  | 345.14 | 352.40  | 0.76           | 4.09               | 346.01 |
| Jul    | BC        | 1.47    | 9.12   | 15.92   | 0.98           | 4.72               | 10.10  |
|        | BCbb      | 0.00    | 0.21   | 0.89    | 0.04           | 0.19               | 0.15   |
|        | BCff      | 1.31    | 8.91   | 15.74   | 1.01           | 4.82               | 9.98   |
|        | BrC       | 0.00    | 0.98   | 7.90    | 0.38           | 1.85               | 0.29   |
|        | BB%       | 0.00    | 4.85   | 20.08   | 1.30           | 6.22               | 2.22   |
|        | CO2       | 338.62  | 344.93 | 353.09  | 0.63           | 3.35               | 343.85 |
| Aug    | BC        | 7.65    | 10.28  | 15.17   | 0.42           | 1.97               | 9.97   |
|        | BCbb      | 0.01    | 0.15   | 0.28    | 0.01           | 0.07               | 0.15   |
|        | BCff      | 7.43    | 10.12  | 15.06   | 0.42           | 1.99               | 9.76   |
|        | BrC       | 0.00    | 0.34   | 1.00    | 0.06           | 0.30               | 0.27   |
|        | BB%       | 0.15    | 2.18   | 4.03    | 0.21           | 0.99               | 2.00   |
|        | CO2       | 335.69  | 342.22 | 350.52  | 0.64           | 3.57               | 341.95 |
| Sep    | BC        | 7.81    | 12.30  | 22.70   | 0.62           | 3.41               | 11.92  |
|        | BCbb      | 0.04    | 0.15   | 0.44    | 0.02           | 0.10               | 0.12   |
|        | BCff      | 7.61    | 12.15  | 22.62   | 0.62           | 3.42               | 11.80  |
|        | BrC       | 0.00    | 0.47   | 4.72    | 0.16           | 0.89               | 0.26   |

|               |             |        |            |        |      |      |        |
|---------------|-------------|--------|------------|--------|------|------|--------|
|               | <b>BB%</b>  | 0.66   | 2.22       | 7.75   | 0.25 | 1.39 | 1.77   |
|               | <b>CO2</b>  | 335.53 | 344.7<br>9 | 359.53 | 0.88 | 4.76 | 344.01 |
| <b>Oct</b>    | <b>BC</b>   | 3.11   | 16.58      | 28.01  | 1.01 | 5.24 | 16.75  |
|               | <b>BCbb</b> | 0.00   | 0.24       | 0.63   | 0.03 | 0.16 | 0.21   |
|               | <b>BCff</b> | 3.11   | 16.34      | 27.59  | 1.01 | 5.25 | 16.33  |
|               | <b>BrC</b>  | 0.00   | 0.67       | 3.25   | 0.14 | 0.75 | 0.40   |
|               | <b>BB%</b>  | 0.00   | 2.81       | 11.50  | 0.48 | 2.50 | 1.80   |
|               | <b>CO2</b>  | 340.00 | 350.3<br>6 | 362.40 | 0.94 | 5.22 | 351.08 |
| <b>Nov</b>    | <b>BC</b>   | 5.64   | 12.09      | 18.20  | 0.58 | 3.18 | 12.01  |
|               | <b>BCbb</b> | 0.20   | 0.67       | 1.42   | 0.06 | 0.32 | 0.60   |
|               | <b>BCff</b> | 5.07   | 11.42      | 17.70  | 0.59 | 3.24 | 11.18  |
|               | <b>BrC</b>  | 0.59   | 3.02       | 6.91   | 0.31 | 1.68 | 2.54   |
|               | <b>BB%</b>  | 4.54   | 8.89       | 13.55  | 0.50 | 2.71 | 8.77   |
|               | <b>CO2</b>  | 335.52 | 341.3<br>0 | 346.61 | 0.57 | 3.14 | 341.21 |
| <b>Dec</b>    | <b>BC</b>   | 6.76   | 13.53      | 20.37  | 0.58 | 3.22 | 13.00  |
|               | <b>BCbb</b> | 0.24   | 0.89       | 2.65   | 0.08 | 0.47 | 0.82   |
|               | <b>BCff</b> | 5.64   | 12.64      | 19.89  | 0.61 | 3.40 | 12.32  |
|               | <b>BrC</b>  | 1.24   | 5.53       | 21.60  | 0.74 | 4.13 | 4.50   |
|               | <b>BB%</b>  | 4.11   | 10.47      | 24.96  | 0.81 | 4.51 | 9.75   |
|               | <b>CO2</b>  | 335.00 | 339.6<br>2 | 344.69 | 0.45 | 2.49 | 339.56 |
| <b>Jan-22</b> | <b>BC</b>   | 7.36   | 11.38      | 19.75  | 0.49 | 2.75 | 10.27  |
|               | <b>BCbb</b> | 0.57   | 1.33       | 3.61   | 0.11 | 0.63 | 1.13   |
|               | <b>BCff</b> | 6.54   | 10.06      | 17.15  | 0.48 | 2.67 | 9.42   |
|               | <b>BrC</b>  | 3.83   | 8.87       | 25.30  | 0.91 | 5.07 | 7.51   |
|               | <b>BB%</b>  | 6.47   | 14.20      | 24.97  | 0.77 | 4.27 | 13.97  |
|               | <b>CO2</b>  | 329.87 | 336.7<br>3 | 340.41 | 0.43 | 2.42 | 337.28 |
| <b>Feb-22</b> | <b>BC</b>   | 9.16   | 14.32      | 18.52  | 0.87 | 3.25 | 14.59  |
|               | <b>BCbb</b> | 0.67   | 1.32       | 2.74   | 0.15 | 0.57 | 1.34   |
|               | <b>BCff</b> | 7.96   | 13.00      | 16.72  | 0.86 | 3.23 | 13.75  |
|               | <b>BrC</b>  | 3.05   | 8.56       | 26.56  | 1.90 | 7.10 | 6.18   |
|               | <b>BB%</b>  | 7.00   | 11.36      | 19.93  | 1.08 | 4.03 | 10.93  |
|               | <b>CO2</b>  | 332.81 | 336.7<br>4 | 343.82 | 0.67 | 2.92 | 336.51 |
| <b>Mar-22</b> | <b>BC</b>   | 13.12  | 21.52      | 40.39  | 1.72 | 7.08 | 19.50  |
|               | <b>BCbb</b> | 0.80   | 1.57       | 3.65   | 0.22 | 0.93 | 1.18   |
|               | <b>BCff</b> | 12.23  | 19.95      | 36.74  | 1.51 | 6.24 | 17.96  |
|               | <b>BrC</b>  | 2.63   | 6.32       | 18.68  | 1.19 | 4.92 | 3.96   |
|               | <b>BB%</b>  | 6.97   | 10.03      | 17.97  | 0.69 | 2.85 | 8.62   |
|               | <b>CO2</b>  | NA     | NA         | NA     | NA   | NA   | NA     |

233

234 Data link for the data access:

235 [https://docs.google.com/spreadsheets/d/1N4F\\_ft68syY6n0UIfA6nzI5o-](https://docs.google.com/spreadsheets/d/1N4F_ft68syY6n0UIfA6nzI5o-8LUWjyFfk5NpfquRyg/edit?usp=sharing)  
236 [8LUWjyFfk5NpfquRyg/edit?usp=sharing](https://docs.google.com/spreadsheets/d/1N4F_ft68syY6n0UIfA6nzI5o-8LUWjyFfk5NpfquRyg/edit?usp=sharing)

237 **References**

- 238 Aruna, K., Kumar, T. L., Rao, D. N., Murthy, B. K., Babu, S. S., & Krishnamoorthy, K.:  
239 Scattering and absorption characteristics of atmospheric aerosols over a semi-urban coastal  
240 environment. *Journal of Atmospheric and Solar-Terrestrial Physics*, 119, 211-222,  
241 <https://doi.org/10.1016/j.jastp.2014.08.009> , 2014.
- 242 Favez, O., El Haddad, I., Piot, C., Boréave, A., Abidi, E., Marchand, N., ... & D'anna, B.: Inter-  
243 comparison of source apportionment models for the estimation of wood burning aerosols  
244 during wintertime in an Alpine city (Grenoble, France). *Atmospheric Chemistry and Physics*,  
245 10(12), 5295-5314, <https://doi.org/10.5194/acp-10-5295-2010>, 2010.
- 246 Ganguly, D., Gadhavi, H., Jayaraman, A., Rajesh, T. A., & Misra, A.: Single scattering albedo  
247 of aerosols over the central India: Implications for the regional aerosol radiative forcing.  
248 *Geophysical research letters*, 32(18), <https://doi.org/10.1029/2005GL023903>, 2005.
- 249 Herich, H., Hueglin, C., & Buchmann, B.: A 2.5 year's source apportionment study of black  
250 carbon from wood burning and fossil fuel combustion at urban and rural sites in Switzerland.  
251 *Atmospheric Measurement Techniques*, 4(7), 1409, [doi:10.5194/amt-4-1409-2011](https://doi.org/10.5194/amt-4-1409-2011), 2011.
- 252 Kant, Y., Shaik, D. S., Mitra, D., Chandola, H. C., Babu, S. S., & Chauhan, P.: Black carbon  
253 aerosol quantification over north-west Himalayas: Seasonal heterogeneity, source  
254 apportionment and radiative forcing. *Environmental Pollution*, 257, 113446,  
255 <https://doi.org/10.1016/j.envpol.2019.113446>, 2020.
- 256 Karakoti, I., Singh, N., Shukla, T., Gairola, A. C., & Dobhal, D. P.: Characterization and source  
257 apportionment of black carbon over a valley glacier at transitional climatic zone of the central-  
258 western Himalaya. *Theoretical and Applied Climatology*, 1-15,  
259 <https://doi.org/10.1007/s00704-022-04313-z>, 2022.
- 260 Laskin, A., Laskin, J. and Nizkorodov, S.A., 2015. Chemistry of atmospheric brown carbon.  
261 *Chemical reviews*, 115(10), pp.4335-4382. <https://doi.org/10.1021/cr5006167>
- 262 Martinsson, J., Abdul Azeem, H., Sporre, M.K., Bergström, R., Ahlberg, E., Öström, E.,  
263 Kristensson, A., Swietlicki, E. and Eriksson Stenström, K.: Carbonaceous aerosol source  
264 apportionment using the Aethalometer model–evaluation by radiocarbon and levoglucosan  
265 analysis at a rural background site in southern Sweden. *Atmospheric Chemistry and Physics*,  
266 17(6), 4265-4281, <https://doi.org/10.5194/acp-17-4265-2017>, 2017.
- 267 Moosmüller, H., & Chakrabarty, R. K.: Simple analytical relationships between Ångström  
268 coefficients of aerosol extinction, scattering, absorption, and single scattering albedo.  
269 *Atmospheric Chemistry and Physics*, 11(20), 10677-10680, [https://doi.org/10.5194/acp-11-  
270 10677-2011](https://doi.org/10.5194/acp-11-10677-2011), 2011b.
- 271 Petzold, A., Kopp, C., & Niessner, R.: The dependence of the specific attenuation cross-section  
272 on black carbon mass fraction and particle size. *Atmospheric Environment*, 31(5), 661-672,  
273 [https://doi.org/10.1016/S1352-2310\(96\)00245-2](https://doi.org/10.1016/S1352-2310(96)00245-2), 1997.
- 274 Qin, Y.M., Tan, H.B., Li, Y.J., Li, Z.J., Schurman, M.I., Liu, L., Wu, C. and Chan, C.K.  
275 Chemical characteristics of brown carbon in atmospheric particles at a suburban site near  
276 Guangzhou, China. *Atmospheric Chemistry and Physics*, 18(22), pp.16409-16418.  
277 <https://doi.org/10.5194/acp-18-16409-2018>, 2018

- 278 Weingartner, E., Saathoff, H., Schnaiter, M., Streit, N., Bitnar, B., & Baltensperger, U.:  
279 Absorption of light by soot particles: determination of the absorption coefficient by means of  
280 aethalometers. *Journal of Aerosol Science*, 34(10), 1445-1463, [https://doi.org/10.1016/S0021-](https://doi.org/10.1016/S0021-8502(03)00359-8)  
281 [8502\(03\)00359-8](https://doi.org/10.1016/S0021-8502(03)00359-8), 2003.
- 282 Zotter, P., Herich, H., Gysel, M., El-Haddad, I., Zhang, Y., Močnik, G., ... & Prévôt, A. S.:  
283 Evaluation of the absorption Ångström exponents for traffic and wood burning in the  
284 Aethalometer-based source apportionment using radiocarbon measurements of ambient  
285 aerosol. *Atmospheric Chemistry and Physics*, 17(6), 4229-4249, [https://doi.org/10.5194/acp-](https://doi.org/10.5194/acp-17-4229-2017)  
286 [17-4229-2017](https://doi.org/10.5194/acp-17-4229-2017), 2017.
